# Supplementary material
Source: publisher figshare collection journal article supplement (https://tandf.figshare.com/articles/dataset/_/12853338)
Supplement: Supplementary file 1 [file 26471190]

## Supplementary Information

### Designing novel epitope-based polyvalent vaccines against herpes simplex virus-1 and 2 exploiting the immunoinformatics approach

Bishajit Sarkar , Md. Asad Ullah , Yusha Araf , Sowmen Das , Md. Hasanur Rahman & Abu Tayab Moin

#### Tables

**Supplementary Table S1.** The antigenicity determination and physicochemical property analysis of the selected viral proteins. AN; antigenicity, pI; Isoelectric point, AI; aliphatic index, GRAVY; grand average of hydropathicity.

| ID of the protein sequence | AN      | Total amino acids | pI   | Ext. coefficient (in $M^{-1} cm^{-1}$ ) | Est. half-life (in mammalian cell) | AI    | GRAVY  |
|----------------------------|---------|-------------------|------|-----------------------------------------|------------------------------------|-------|--------|
| P04488                     | Antigen | 550               | 5.74 | 104110                                  | 30 h                               | 74.15 | -0.255 |
| P10211                     | Antigen | 904               | 8.30 | 105255                                  | 30 h                               | 70.83 | -0.403 |
| Q69091                     | Antigen | 394               | 7.64 | 58705                                   | 30 h                               | 89.42 | -0.143 |
| Q703F0                     | Antigen | 552               | 5.61 | 105600                                  | 30 h                               | 73.88 | -0.250 |
| P06436                     | Antigen | 903               | 7.89 | 105255                                  | 30 h                               | 70.91 | -0.392 |
| Q05059                     | Antigen | 394               | 8.10 | 58705                                   | 30 h                               | 88.93 | -0.151 |
| P89475                     | Antigen | 545               | 6.03 | 114080                                  | 30 h                               | 78.97 | -0.183 |
| P08666                     | Antigen | 904               | 8.57 | 95870                                   | 30 h                               | 73.52 | -0.340 |
| Q69467                     | Antigen | 393               | 7.65 | 57215                                   | 30 h                               | 91.15 | -0.124 |
| P06763                     | Antigen | 904               | 8.65 | 95870                                   | 30 h                               | 73.63 | -0.337 |
| P03172                     | Antigen | 393               | 8.11 | 57215                                   | 30 h                               | 91.15 | -0.127 |

**Supplementary Table S2.** MHC class-I epitope prediction and topology, antigenicity, allergenicity, toxicity, conservancy, and human homology analysis of the epitopes of EG-E. AN; antigenicity, AG; allergenicity, CN; conservancy.

| <b>Epitope</b> | <b>Topology</b> | <b>AN</b>   | <b>AG</b>    | <b>Toxicity</b> | <b>CN</b>     | <b>Human Homology</b> |
|----------------|-----------------|-------------|--------------|-----------------|---------------|-----------------------|
| YSMDVVWLR      | Inside          | Antigen     | Allergen     | Non-toxic       | Non-conserved | Non-homolog           |
| YTLVSGDIK      | Inside          | Antigen     | Non-allergen | Non-toxic       | Conserved     | Non-homolog           |
| ITISTAAQY      | Inside          | Antigen     | Non-allergen | Non-toxic       | Conserved     | Non-homolog           |
| TISTAAQYR      | Inside          | Antigen     | Allergen     | Non-toxic       | Conserved     | Non-homolog           |
| VSCLAGTPK      | Inside          | Antigen     | Allergen     | Non-toxic       | Non-conserved | Non-homolog           |
| RTDFVWQER      | Inside          | Non-antigen | Allergen     | Non-toxic       | Non-conserved | Non-homolog           |
| RIYESCLYH      | Inside          | Non-antigen | Allergen     | Non-toxic       | Non-conserved | Non-homolog           |
| VVEQPLPQR      | Outside         | Non-antigen | Non-allergen | Non-toxic       | Conserved     | Non-homolog           |
| AVKSRASGK      | Inside          | Antigen     | Non-allergen | Non-toxic       | Conserved     | Non-homolog           |
| GTPKTSWRR      | Inside          | Non-antigen | Non-allergen | Non-toxic       | Non-conserved | Non-homolog           |

**Supplementary Table S3.** MHC class-II epitope prediction and topology, antigenicity, allergenicity, toxicity, conservancy, cytokine production, and human homology analysis of the epitopes of EG-E. AN; antigenicity, AG; allergenicity, CN; conservancy.

| <b>Epitope</b>  | <b>Topology</b> | <b>AN</b>   | <b>AG</b>    | <b>Toxicity</b> | <b>CN</b>     | <b>IFN-gamma<br/>inducing<br/>capacity</b> | <b>IL-4<br/>inducing<br/>capacity</b> | <b>IL-10<br/>inducing<br/>capacity</b> | <b>Human<br/>homology</b> |
|-----------------|-----------------|-------------|--------------|-----------------|---------------|--------------------------------------------|---------------------------------------|----------------------------------------|---------------------------|
| GAALLSALGLSVWA  | Outside         | Non-antigen | Non-allergen | Non toxic       | Non-conserved | Non-inducer                                | Non-inducer                           | Non-inducer                            | Non-homolog               |
| MGAALLSALGLSVW  | Outside         | Antigen     | Non-allergen | Non toxic       | Non-conserved | Non-inducer                                | Non-inducer                           | Non-inducer                            | Non-homolog               |
| VMGAALLSALGLSV  | Outside         | Antigen     | Non-allergen | Non toxic       | Non-conserved | Non-inducer                                | Non-inducer                           | Non-inducer                            | Non-homolog               |
| AALLSALGLSVWAC  | Outside         | Non-antigen | Non-allergen | Non toxic       | Non-conserved | Inducer                                    | Non-inducer                           | Non-inducer                            | Non-homolog               |
| ALLSALGLSVWACM  | Outside         | Non-antigen | Non-allergen | Non toxic       | Non-conserved | Inducer                                    | Non-inducer                           | Non-inducer                            | Non-homolog               |
| GAVMGAALLSALGL  | Outside         | Antigen     | Non-allergen | Non toxic       | Conserved     | Non-inducer                                | Non-inducer                           | Inducer                                | Non-homolog               |
| AVMGAALLSALGLS  | Outside         | Antigen     | Non-allergen | Non toxic       | Conserved     | Non-inducer                                | Non-inducer                           | Inducer                                | Non-homolog               |
| DQTYSDVWVWLRFDV | inside          | Antigen     | Allergen     | Non toxic       | Conserved     | Non-inducer                                | Non-inducer                           | Non-inducer                            | Non-homolog               |
| AWGHITISTAAQYRN | inside          | Antigen     | Allergen     | Non toxic       | Conserved     | Non-inducer                                | Inducer                               | Non-inducer                            | Non-homolog               |
| GHITISTAAQYRNAV | inside          | Antigen     | Allergen     | Non toxic       | Conserved     | Inducer                                    | Inducer                               | Non-inducer                            | Non-homolog               |

**Supplementary Table S4.** MHC class-I epitope prediction and topology, antigenicity, allergenicity, conservancy, and human homology analysis of the epitopes of EG-B. AN; antigenicity, AG; allergenicity, CN; conservancy.

| <b>Epitope</b> | <b>Topology</b> | <b>AN</b>   | <b>AG</b>    | <b>Toxicity</b> | <b>CN</b>     | <b>Human Homology</b> |
|----------------|-----------------|-------------|--------------|-----------------|---------------|-----------------------|
| KVTDMVMRK      | Inside          | Antigen     | Non-allergen | Non-toxic       | Conserved     | Non-homolog           |
| GTSALLSAK      | Outside         | Non-antigen | Non-allergen | Non-toxic       | Non-Conserved | Non-homolog           |
| LGENNELRL      | Inside          | Non-antigen | Non-allergen | Non-toxic       | Conserved     | Non-homolog           |
| AIASATVGR      | Inside          | Antigen     | Non-allergen | Non-toxic       | Non-conserved | Non-homolog           |
| TVAWDWVPK      | Outside         | Non-antigen | Non-allergen | Non-toxic       | 100%          | Non-homolog           |
| SAMERTEHK      | Inside          | Antigen     | Allergen     | Non-toxic       | Conserved     | Non-homolog           |
| YAYSHQLSR      | Inside          | Antigen     | Non-allergen | Non-toxic       | Conserved     | Non-homolog           |
| FTFGGGYVY      | Outside         | Non-antigen | Allergen     | Non-toxic       | Conserved     | Non-homolog           |
| ASANASVER      | Inside          | Antigen     | Non-allergen | Non-toxic       | Conserved     | Non-homolog           |
| ADIDTVIHA      | Inside          | Non-antigen | Allergen     | Non-toxic       | Non-conserved | Non-homolog           |

**Supplementary Table S5.** MHC class-II epitope prediction and topology, antigenicity, allergenicity, conservancy, cytokine production, and human homology analysis of the epitopes of EG-B. AN; antigenicity, AG; allergenicity, CN; conservancy.

| <b>Epitope</b>  | <b>Topology</b> | <b>AN</b>   | <b>AG</b>    | <b>Toxicity</b> | <b>CN</b>     | <b>IFN-gamma<br/>inducing<br/>capacity</b> | <b>IL-4<br/>inducing<br/>capacity</b> | <b>IL-10<br/>inducing<br/>capacity</b> | <b>Human<br/>homolog</b> |
|-----------------|-----------------|-------------|--------------|-----------------|---------------|--------------------------------------------|---------------------------------------|----------------------------------------|--------------------------|
| GFLIAYQPLLSNTLA | Outside         | Non-antigen | Non-allergen | Non toxic       | Non-conserved | Non-inducer                                | Non-inducer                           | Inducer                                | Non-homolog              |
| AVGLLVLAGLAAAFF | Outside         | Antigen     | Non-allergen | Non toxic       | Conserved     | Non-inducer                                | Non-inducer                           | Non-inducer                            | Non-homolog              |
| VGLLVLAGLAAAFFA | Outside         | Antigen     | Non-allergen | Non toxic       | Conserved     | Non-inducer                                | Non-inducer                           | Non-inducer                            | Non-homolog              |
| REMIRYMALVSAMER | Inside          | Non-antigen | Allergen     | Non toxic       | Non-conserved | Non-inducer                                | Non-inducer                           | Non-inducer                            | Non-homolog              |
| EMIRYMALVSAMERT | Inside          | Antigen     | Allergen     | Non toxic       | Non-conserved | Inducer                                    | Non-inducer                           | Non-inducer                            | Non-homolog              |
| MIRYMALVSAMERTE | Inside          | Antigen     | Allergen     | Non toxic       | Non-conserved | Inducer                                    | Non-inducer                           | Non-inducer                            | Non-homolog              |
| IRYMALVSAMERTEH | Inside          | Antigen     | Non-allergen | Non toxic       | Conserved     | Inducer                                    | Non-inducer                           | Non-inducer                            | Non-homolog              |
| GGFLIAYQPLLSNTL | Outside         | Non-antigen | Non-allergen | Non toxic       | Conserved     | Non-inducer                                | Non-inducer                           | Inducer                                | Non-homolog              |
| ATMYKDVTVSQVWF  | Inside          | Antigen     | Non-allergen | Non toxic       | Non-conserved | Non-inducer                                | Non-inducer                           | Non-inducer                            | Non-homolog              |
| FKATMYKDVTVSQV  | Inside          | Antigen     | Allergen     | Non toxic       | Conserved     | Non-inducer                                | Inducer                               | Non-inducer                            | Non-homolog              |

**Supplementary Table S6.** MHC class-I epitope prediction and topology, antigenicity, allergenicity, conservancy, and human homology analysis of the epitopes of EG-D. AN; antigenicity, AG; allergenicity, CN; conservancy.

| <b>Epitope</b> | <b>Topology</b> | <b>AN</b>   | <b>AG</b>    | <b>Toxicity</b> | <b>CN</b>     | <b>Human Homology</b> |
|----------------|-----------------|-------------|--------------|-----------------|---------------|-----------------------|
| RTVAVYSLK      | Inside          | Antigen     | Non-allergen | Non-toxic       | Conserved     | Homolog               |
| TVYYAVLER      | Inside          | Non-antigen | Allergen     | Non-toxic       | Conserved     | Homolog               |
| RTQPRWNY       | Inside          | Antigen     | Allergen     | Non-toxic       | Non-conserved | Homolog               |
| KMADPNRFR      | Inside          | Antigen     | Non-allergen | Non-toxic       | Conserved     | Non-homolog           |
| LTDPPGVRR      | Inside          | Non-antigen | Allergen     | Non-toxic       | Conserved     | Non-homolog           |
| KIAGWHGPK      | Inside          | Non-antigen | Non-antigen  | Non-toxic       | Non-conserved | Homolog               |
| AIPITVMEY      | Inside          | Non-antigen | Non-allergen | Non-toxic       | Conserved     | Homolog               |
| SIQDAATPY      | Inside          | Antigen     | Non-allergen | Non-toxic       | Conserved     | Non-homolog           |
| ITQFILEHR      | Inside          | Antigen     | Allergen     | Non-toxic       | Conserved     | Homolog               |

**Supplementary Table S7.** MHC class-II epitope prediction and topology, antigenicity, allergenicity, conservancy, cytokine production, and human homology analysis of the epitopes of EG-D. AN; antigenicity, AG; allergenicity, CN; conservancy.

| <b>Epitope</b>  | <b>Topology</b> | <b>AN</b> | <b>AG</b>    | <b>Toxicity</b> | <b>CN</b>     | <b>IFN-gamma inducing capacity</b> | <b>IL-4 inducing capacity</b> | <b>IL-10 inducing capacity</b> | <b>Human homology</b> |
|-----------------|-----------------|-----------|--------------|-----------------|---------------|------------------------------------|-------------------------------|--------------------------------|-----------------------|
| PRWNYDSFSAVSED  | Outside         | Antigen   | Non-allergen | Non toxic       | Non-conserved | Inducer                            | Non-inducer                   | Inducer                        | Homolog               |
| QPRWNYDSFSAVSE  | Inside          | Antigen   | Non-allergen | Non toxic       | Non-conserved | Inducer                            | Inducer                       | Inducer                        | Homolog               |
| RTQPRWNYDSFSAV  | Inside          | Antigen   | Allergen     | Non toxic       | Non-conserved | Inducer                            | Inducer                       | Inducer                        | Non-homolog           |
| RWNYDSFSAVSEDN  | Inside          | Antigen   | Allergen     | Non toxic       | Non-conserved | Inducer                            | Non-inducer                   | Inducer                        | Homolog               |
| TQPRWNYDSFSAVS  | Inside          | Antigen   | Allergen     | Non toxic       | Conserved     | Inducer                            | Inducer                       | Inducer                        | Homolog               |
| ILFVVIVGLHGVRSK | Outside         | Antigen   | Non-allergen | Non toxic       | Conserved     | Inducer                            | Non-inducer                   | Non-inducer                    | Non-homolog           |
| GAVILFVVIVGLHGV | Outside         | Antigen   | Non-allergen | Non toxic       | Conserved     | Inducer                            | Non-inducer                   | Non-inducer                    | Non-homolog           |
| VILFVVIVGLHGVR  | Outside         | Antigen   | Non-allergen | Non toxic       | Conserved     | Inducer                            | Non-inducer                   | Non-inducer                    | Non-homolog           |
| AVILFVVIVGLHGVR | Outside         | Antigen   | Non-allergen | Non toxic       | Conserved     | Inducer                            | Non-inducer                   | Non-inducer                    | Non-homolog           |
| FVVIVGLHGVRSKYA | Outside         | Antigen   | Non-allergen | Non toxic       | Conserved     | Inducer                            | Non-inducer                   | Non-inducer                    | Non-homolog           |

**Supplementary Table S8.** B-cell epitope prediction and antigenicity, allergenicity, toxicity, conservancy, human homology, and topology analysis of the epitopes of the three selected proteins. AN; antigenicity, AG; allergenicity.

| Envelope glycoprotein E                                      |                 |                          |             |               |                         | Envelope glycoprotein B                |                     |                      |             |               |                         | Envelope glycoprotein D                          |             |                          |             |               |                |
|--------------------------------------------------------------|-----------------|--------------------------|-------------|---------------|-------------------------|----------------------------------------|---------------------|----------------------|-------------|---------------|-------------------------|--------------------------------------------------|-------------|--------------------------|-------------|---------------|----------------|
| Epitope                                                      | AN              | AG                       | Topology    | Toxicity      | Human homology          | Epitope                                | AN                  | AG                   | Topology    | Toxicity      | Human homology          | Epitope                                          | AN          | AG                       | Topology    | Toxicity      | Human homology |
| PECLS<br>PADA<br>PCAA<br>ST                                  | An<br>tig<br>en | Non<br>-<br>aller<br>gen | Outs<br>ide | Non-<br>toxic | Non<br>-<br>hom<br>olog | EQPR<br>RCPT<br>RPEG<br>QNYT           | Non-<br>antige<br>n | Allerg<br>en         | Insid<br>e  | Non-<br>toxic | Non<br>-<br>hom<br>olog | GLP<br>DPF<br>QPP<br>SLP                         | Anti<br>gen | Non<br>-<br>aller<br>gen | Outsi<br>de | Non-<br>toxic | Homol<br>og    |
| VVEQ<br>PLPQR<br>GADL<br>AEPT<br>HPHV<br>GAPP<br>HAPP<br>THG | An<br>tig<br>en | Non<br>-<br>aller<br>gen | Outs<br>ide | Non-<br>toxic | Non<br>-<br>hom<br>olog | TTKA<br>RATA<br>PTTR<br>N              | Antig<br>en         | Non-<br>allerg<br>en | Insid<br>e  | Non-<br>toxic | Non<br>-<br>hom<br>olog | APS<br>EAP<br>QIV<br>RG<br>ASE<br>DV<br>RK<br>QP | Anti<br>gen | Alle<br>rgen             | Outsi<br>de | Non-<br>toxic | Homol<br>og    |
| AYAP<br>PAPSA<br>TGGL                                        | An<br>tig<br>en | Non<br>-<br>aller<br>gen | Outs<br>ide | Non-<br>toxic | Non<br>-<br>hom<br>olog | REQS<br>RKPP<br>NPTPP<br>PPGAS<br>ANAS | Antig<br>en         | Non-<br>allerg<br>en | Insid<br>e  | Non-<br>toxic | Non<br>-<br>hom<br>olog | SAC<br>LSP<br>QA<br>YQ<br>QG<br>VT               | Anti<br>gen | Non<br>-<br>aller<br>gen | Inside      | Non-<br>toxic | Homol<br>og    |
| YADW<br>SSDSE<br>GERD<br>QVPW                                | An<br>tig<br>en | Non<br>-<br>aller<br>gen | Outs<br>ide | Non-<br>toxic | Non<br>-<br>hom<br>olog | YEDQ<br>GPLV<br>EGQL<br>GEN            | Non-<br>antige<br>n | Allerg<br>en         | Outs<br>ide | Non-<br>toxic | Non<br>-<br>hom<br>olog | WH<br>GPK<br>APY<br>TST                          | Anti<br>gen | Non<br>-<br>aller<br>gen | Outsi<br>de | Non-<br>toxic | Homol<br>og    |



|       |   |   |   |   |   |   |      |       |        |      |       |     |     |      |       |        |       |        |  |
|-------|---|---|---|---|---|---|------|-------|--------|------|-------|-----|-----|------|-------|--------|-------|--------|--|
| LAPPE |   |   |   |   |   |   |      |       |        |      |       |     | LLP |      |       |        |       |        |  |
| RPDSP |   |   |   |   |   |   |      |       |        |      |       |     | PEL |      |       |        |       |        |  |
| STNG  |   |   |   |   |   |   |      |       |        |      |       |     | SET |      |       |        |       |        |  |
| SG    |   |   |   |   |   |   |      |       |        |      |       |     | PNA |      |       |        |       |        |  |
|       |   |   |   |   |   |   |      |       |        |      |       |     | TQP |      |       |        |       |        |  |
|       |   |   |   |   |   |   |      |       |        |      |       |     | ELA |      |       |        |       |        |  |
|       |   |   |   |   |   |   |      |       |        |      |       |     | PED |      |       |        |       |        |  |
|       |   |   |   |   |   |   |      |       |        |      |       |     | PED |      |       |        |       |        |  |
|       |   |   |   |   |   |   |      |       |        |      |       |     | SAL |      |       |        |       |        |  |
|       |   |   |   |   |   |   |      |       |        |      |       |     | LED |      |       |        |       |        |  |
|       |   |   |   |   |   |   |      |       |        |      |       |     | PVG |      |       |        |       |        |  |
|       |   |   |   |   |   |   |      |       |        |      |       |     | TV  |      |       |        |       |        |  |
|       |   |   |   |   |   |   |      |       |        |      |       |     | APQ |      |       |        |       |        |  |
|       |   |   |   |   |   |   |      |       |        |      |       |     | PPN |      |       |        |       |        |  |
|       |   |   |   |   |   |   |      |       |        |      |       |     | WHI |      |       |        |       |        |  |
|       |   |   |   |   |   |   |      |       |        |      |       |     | PSI |      |       |        |       |        |  |
|       |   |   |   |   |   |   |      |       |        |      |       |     | QD  |      |       |        |       |        |  |
|       |   |   |   |   |   |   |      |       |        |      |       |     | AA  |      |       |        |       |        |  |
|       |   |   |   |   |   |   |      |       |        |      |       |     | TPY |      |       |        |       |        |  |
|       |   |   |   |   |   |   |      |       |        |      |       |     | HPP |      |       |        |       |        |  |
|       |   |   |   |   |   |   |      |       |        |      |       |     | ATP |      |       |        |       |        |  |
|       |   |   |   |   |   |   |      |       |        |      |       |     | NN  |      |       |        |       |        |  |
| -     | - | - | - | - | - | - | RTEH | Antig | Non-   | Outs | Non-  | Non | IRE | Anti | Non   | Inside | Non-  | Non-   |  |
|       |   |   |   |   |   |   | KAKK | en    | allerg | ide  | toxic | -   | DD  | gen  | -     |        | toxic | homolo |  |
|       |   |   |   |   |   |   | KG   |       | en     |      |       | hom | QPS |      | aller |        |       | g      |  |
|       |   |   |   |   |   |   |      |       |        |      | olog  | SHQ |     | gen  |       |        |       |        |  |

**Supplementary Table S9.** Results of the secondary structure analysis of the vaccine constructs.

| Name of the vaccine | Alpha helix (percentage of amino acids) | Beta sheet (percentage of amino acids) | Coil structure (percentage of amino acids) |
|---------------------|-----------------------------------------|----------------------------------------|--------------------------------------------|
| HV-1                | 22.0%                                   | 14.6%                                  | 63.4%                                      |
| HV-2                | 29.2%                                   | 12.3%                                  | 58.5%                                      |
| HV-3                | 39.8%                                   | 6.6%                                   | 53.6%                                      |

**Supplementary Table S10.** Results of the tertiary structure analysis of the vaccine constructs.

| Name of the vaccine | Number of the domains | p-value  |
|---------------------|-----------------------|----------|
| HV-1                | 3                     | 1.67e-04 |
| HV-2                | 3                     | 8.91e-05 |
| HV-3                | 3                     | 1.73e-04 |

**Supplementary Table S11.** The list of the predicted conformational B-cell epitopes of the best vaccine, HV-1 with their scores.

| No | Residues                                                                                                                                                                                                                                                                                                                                                                                                                                                                                                                           | Number of residues | Score | Figure                      |
|----|------------------------------------------------------------------------------------------------------------------------------------------------------------------------------------------------------------------------------------------------------------------------------------------------------------------------------------------------------------------------------------------------------------------------------------------------------------------------------------------------------------------------------------|--------------------|-------|-----------------------------|
| 01 | T452, T453, R454, K456, K457, T459, E460, H461, K462, A463, K464, K465, K466, G467, K468, K469, R470, E471, Q472, S473, R474, K475, P476, P477, N478, P479, T480, P481, P482, P483, P484, G485, A486, S487, A488, N489, A490, S491, K492, K493, I494, R495, E496, D497, D498, Q499, P500, S501, S502, H503, Q504, K505, K506, A507, K508, F509, V510, A511, A512, W513, T514, L515, K516, A517, A518, A519, G520, G521, G522, G523, S524                                                                                           | 71                 | 0.823 | Supplementary Figure S8 (a) |
| 02 | N162, R165, G166, G167, G168, G169, S170, S171, I172, Q173, D174, A175, A176, T177, P178, Y179, G180, P181, G182, P183, G184, G185, A186, V187, M188, G189, A190, A191, L192, L193, L194, S195, A196, L197, G198, L199, G200, P201, G202, P203, G204, A205, V206, M207, G208, A209, A210, L211, L212, L213, S214, A215, L216, G217, L218, S219, G220, P221, G222, P223, G224, I225, R226, Y227, M228, A229, L230, V231, S232, A233, M234, E235, R236, T237, E238, H239, G240, P241, G242, P243, G244, I245, L246, F247, V248, G252 | 86                 | 0.771 | Supplementary Figure S8 (b) |
| 03 | E1, A2, A3, A4, K5, G6, I7, I8, N9, T10, L11, Q12, K13, Y14, Y15, C16, R17, V18, R19, G20, G21, R22, C23, A24, V25, L26, S27, C28, L29, P30, K31, E32, Q34, I35, G36, K37, C38, S39, T40, R41, G42, R43, K44, C45, C46, R47, R48, K50, E51, A52, A53, A54, K55, A56, K57, F58, V59, A60, A61, A62, T63, L64, K65, A66, A67, A68, G69, G70, G71, S72, Y73, T74, L75, S76, V77, G78, D79, I80, K81, G82, G83, G84, G85, S90, T91, A92, A93, Q94, Y95, G96, G97, G98, A106, G112, G113, K115                                          | 96                 | 0.656 | Supplementary Figure S8 (c) |
| 04 | G314, L315, H316, G317, V318, R319, G320, P321, G322, P323, G324, F325, V326, V327, I328, V329, A361, P362, P363, A364, P365                                                                                                                                                                                                                                                                                                                                                                                                       | 21                 | 0.555 | Supplementary Figure S8 (d) |

## Figures

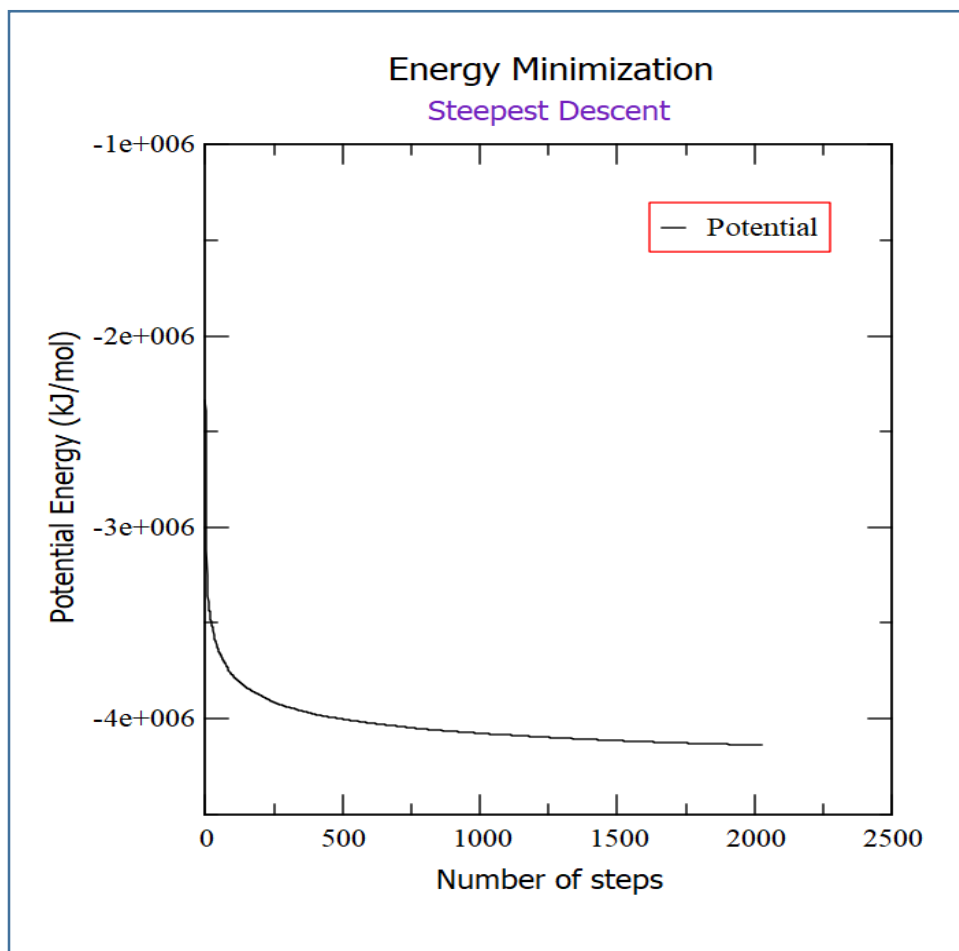

**Supplementary Figure S1.** Potential Energy calculated at the steepest descent.

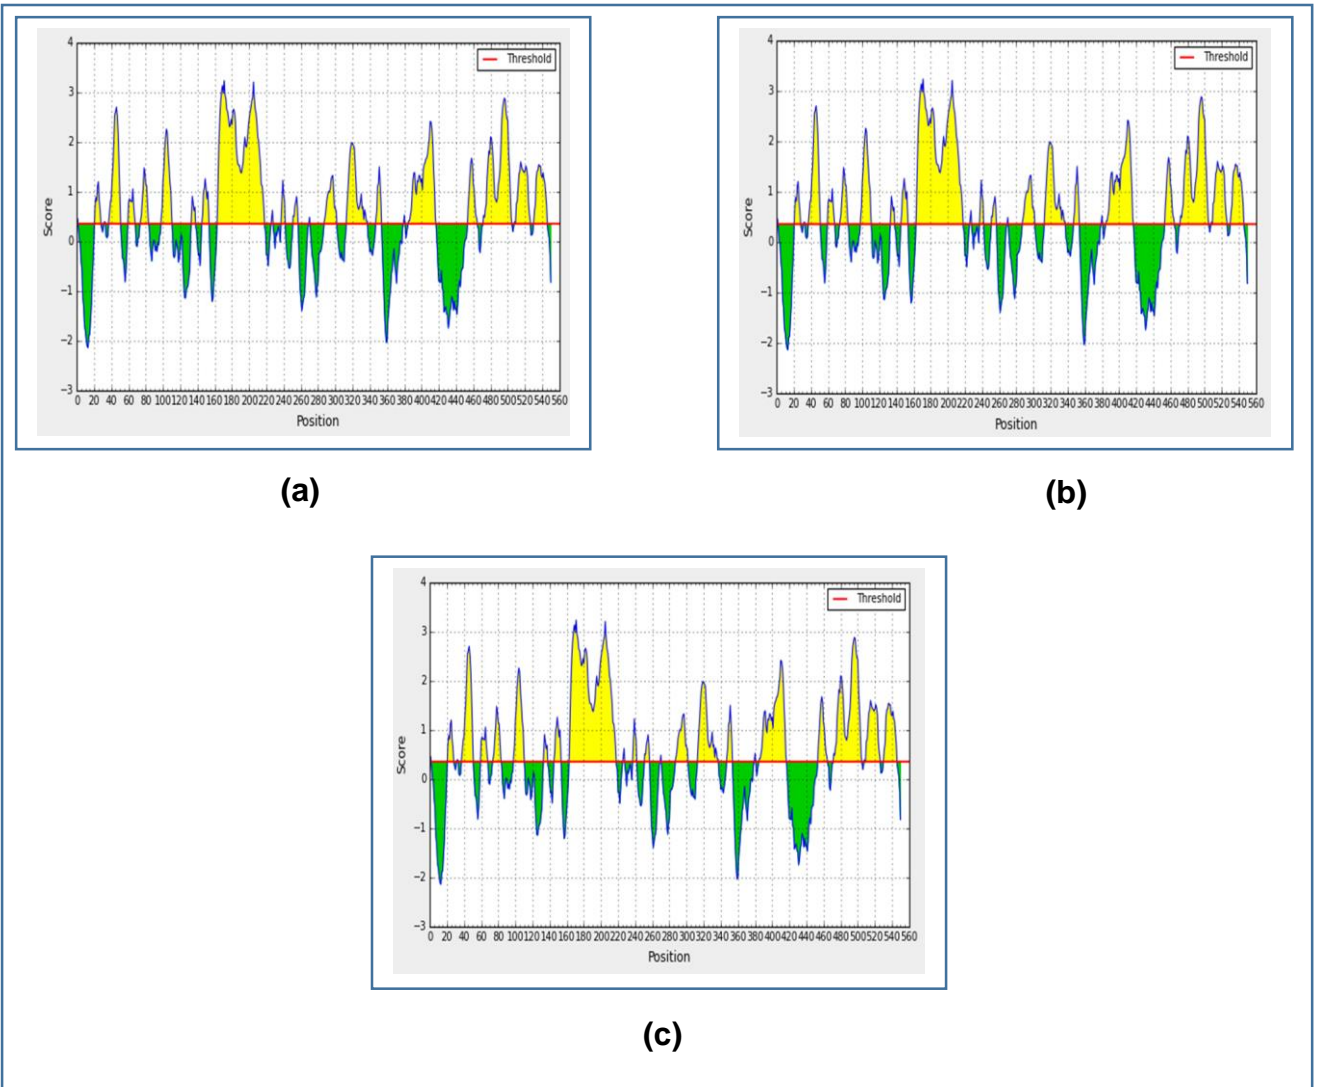

**Supplementary Figure S2.** Figure showing the graphs of the B-cell epitope prediction of the three selected proteins using BepiPred linear epitope prediction method. Here, (a) is the graph of epitope prediction for envelope protein E, (b) is the graph of epitope prediction for envelope glycoprotein B and (c) is the graph of epitope prediction for envelope protein D.

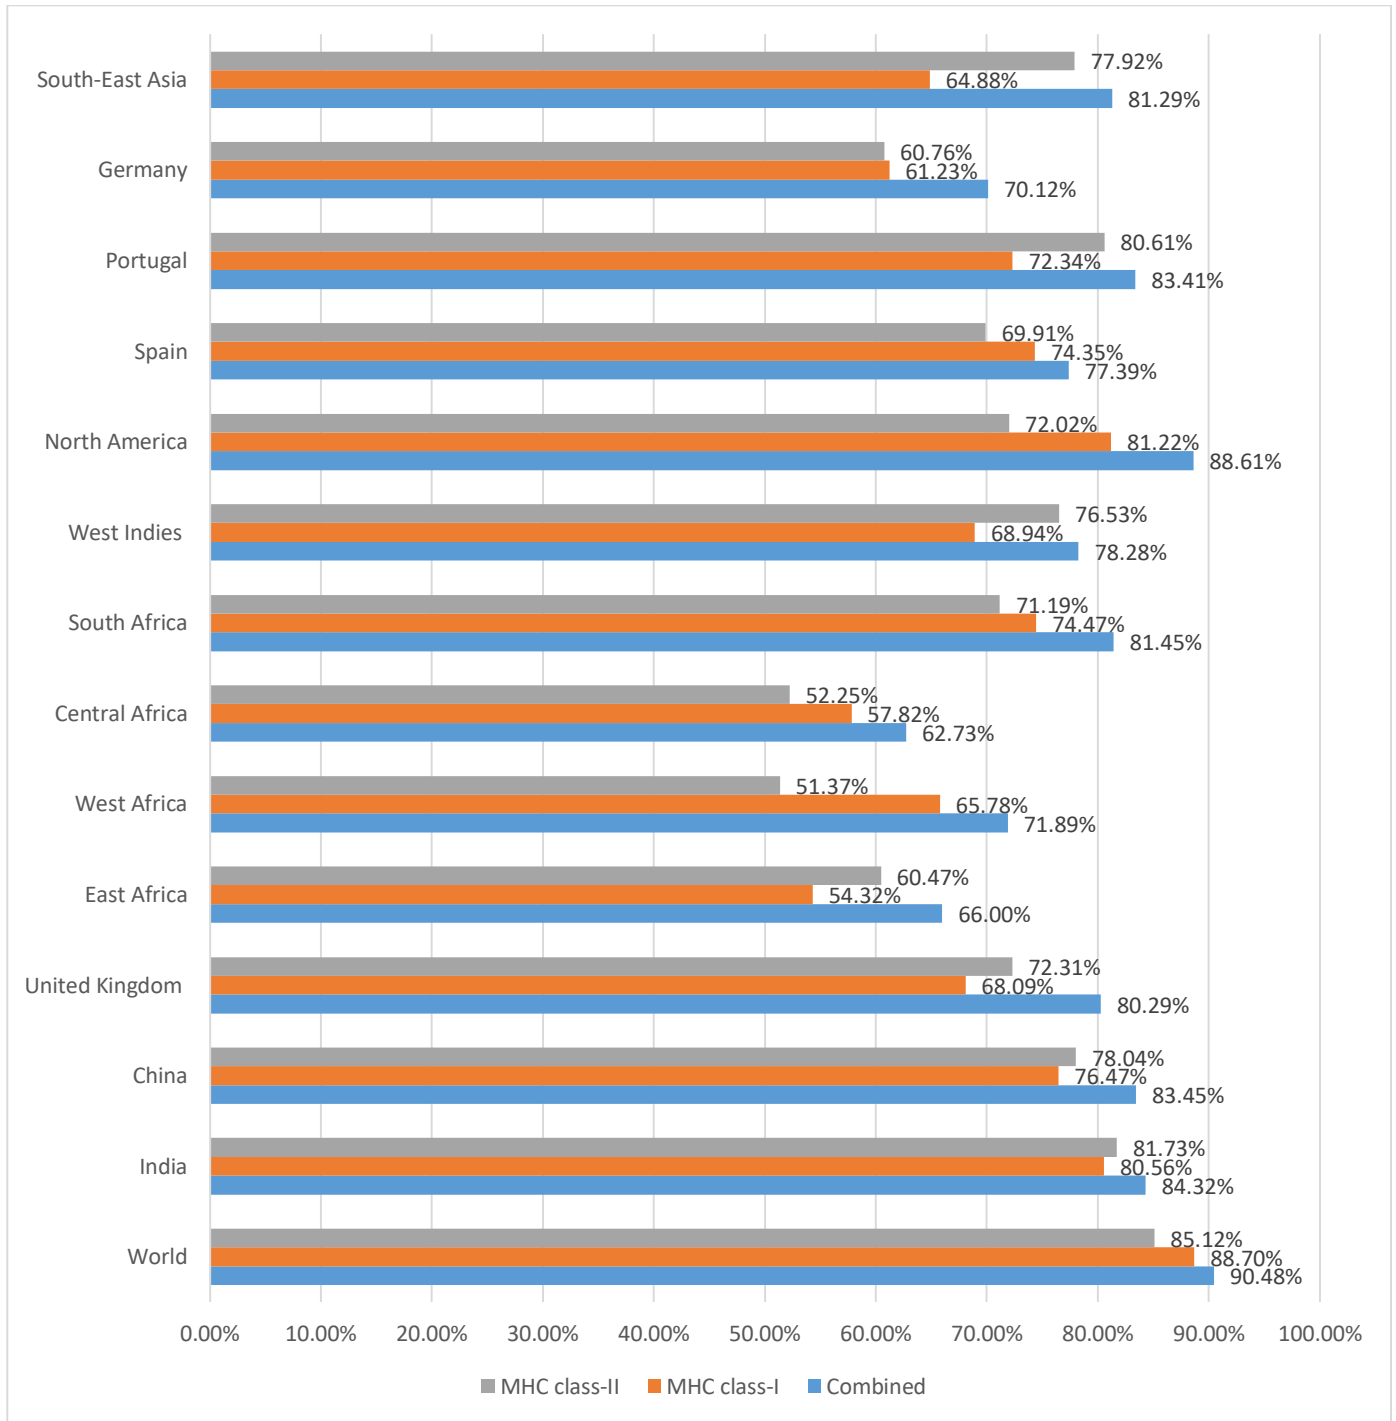

**Supplementary Figure S3.** The result of the population coverage analysis of the best selected epitopes and their selected MHC alleles.

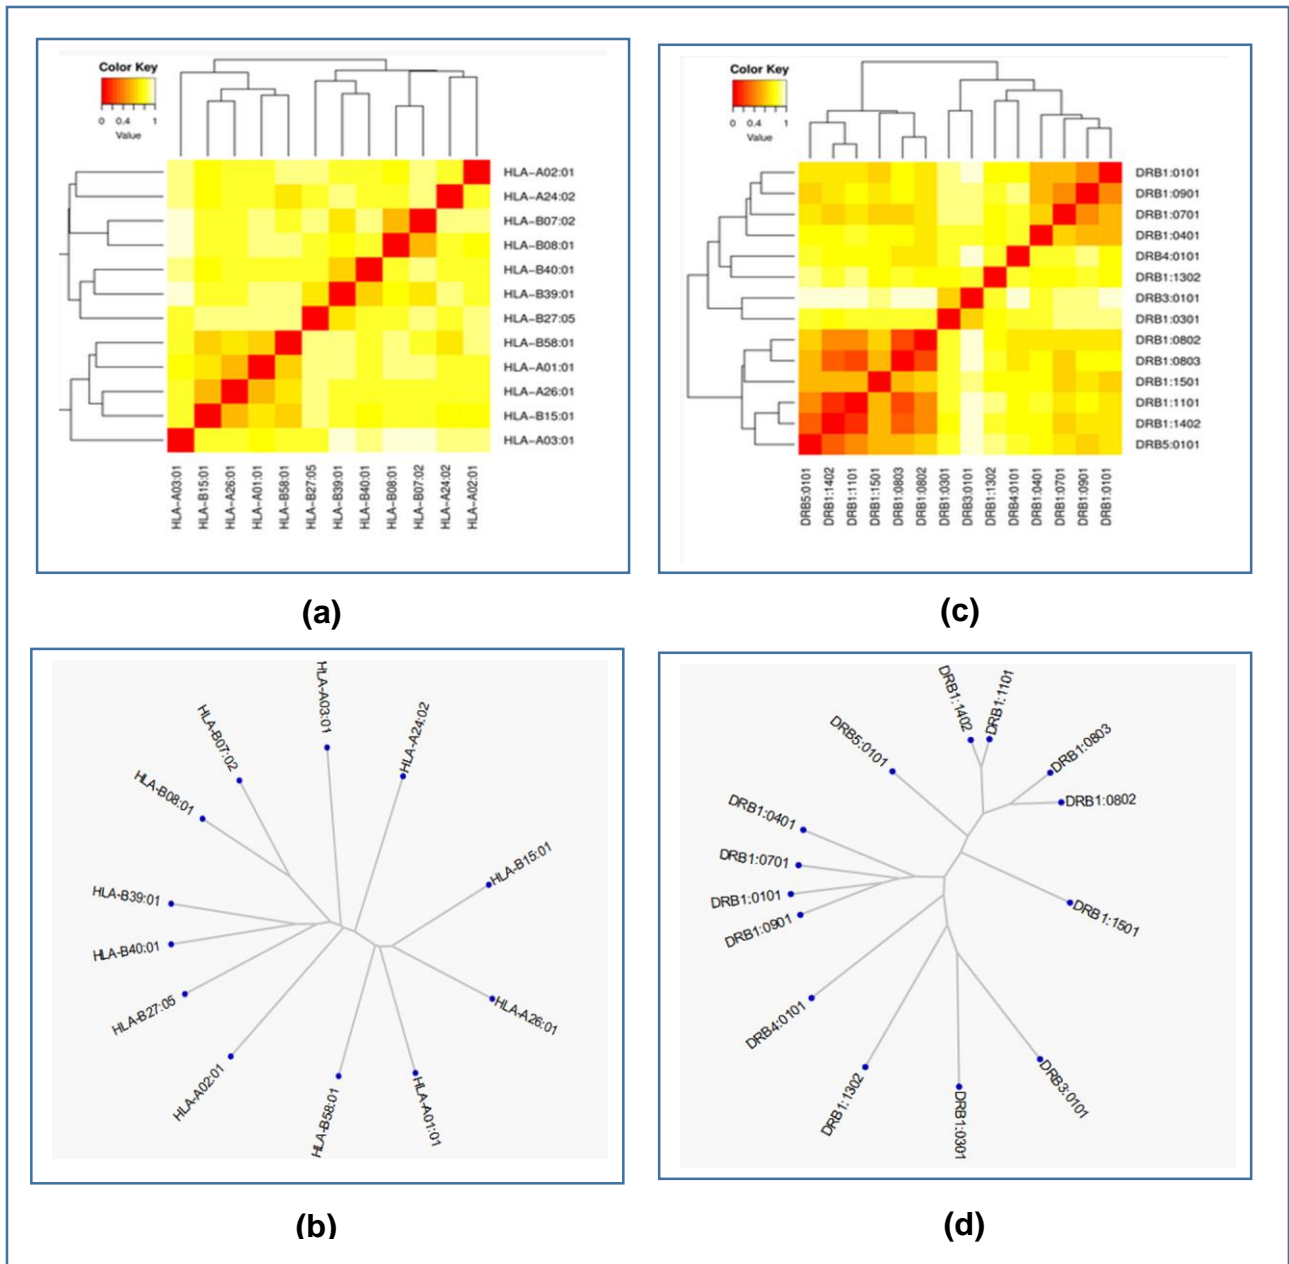

**Supplementary Figure S4.** The results of the MHC cluster analysis. Here, (a) is the heat map (left) and the tree map (right) of MHC class-I cluster analysis, (b) is the heat map (left) and the tree map (right) of MHC class-II cluster analysis.

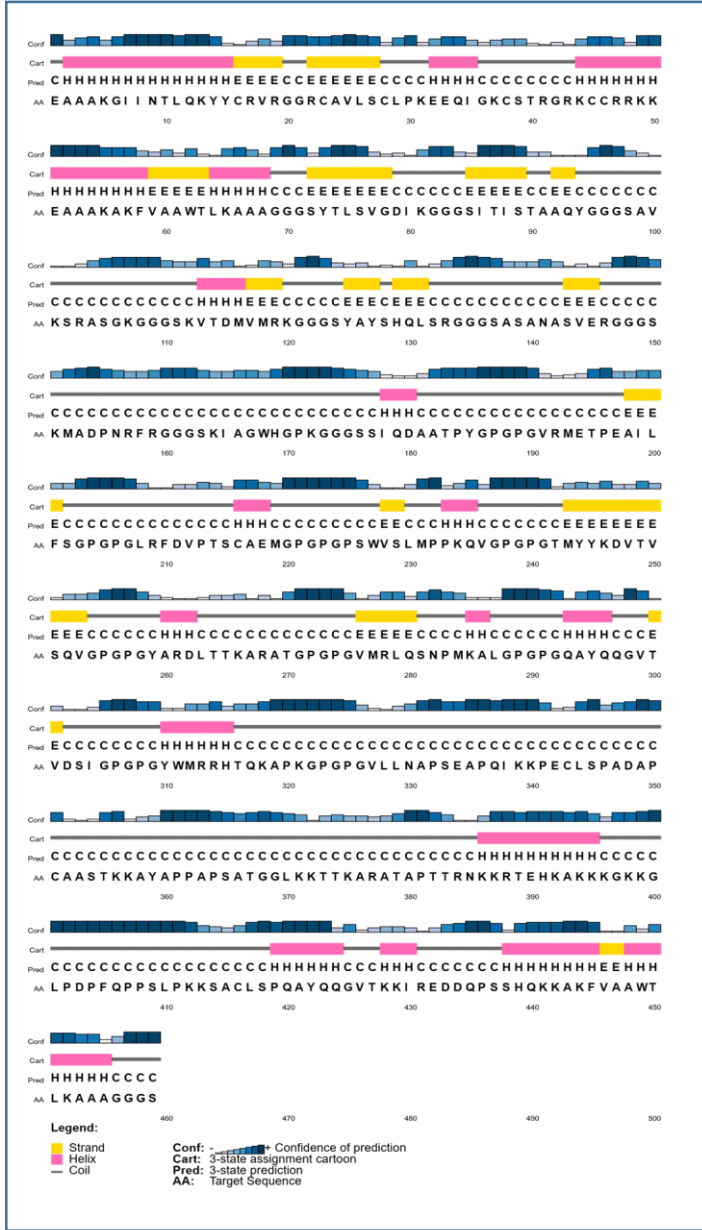

(a)

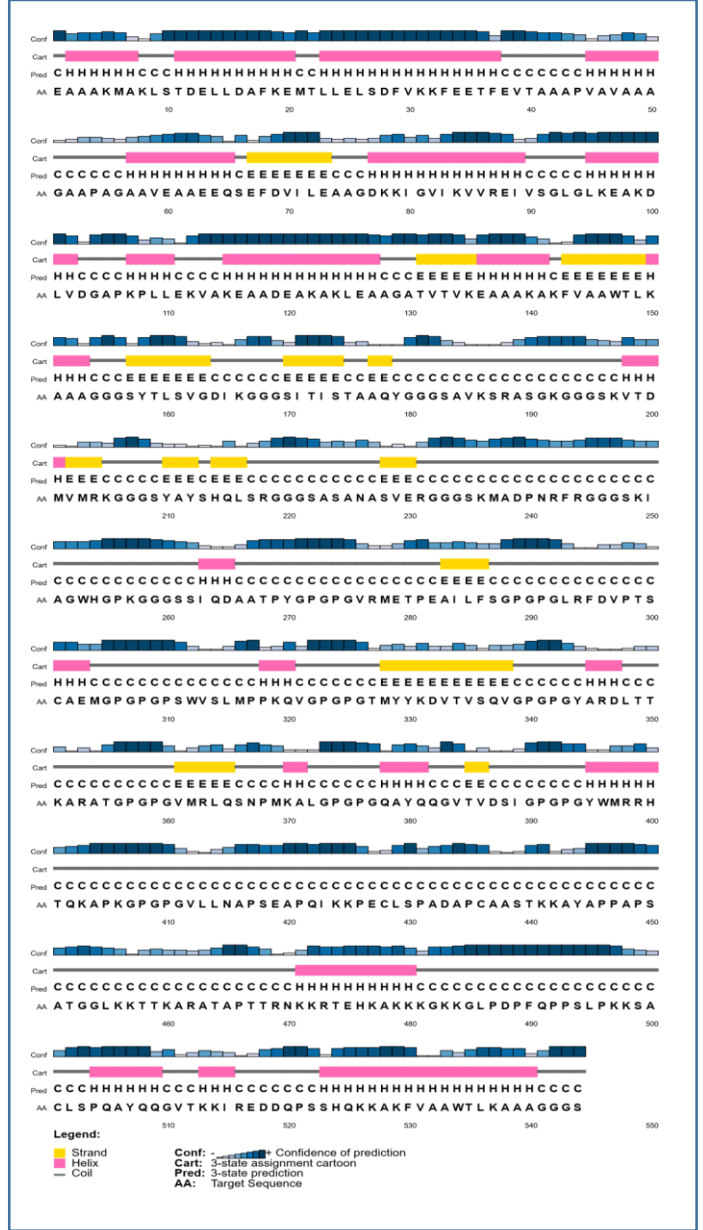

(b)



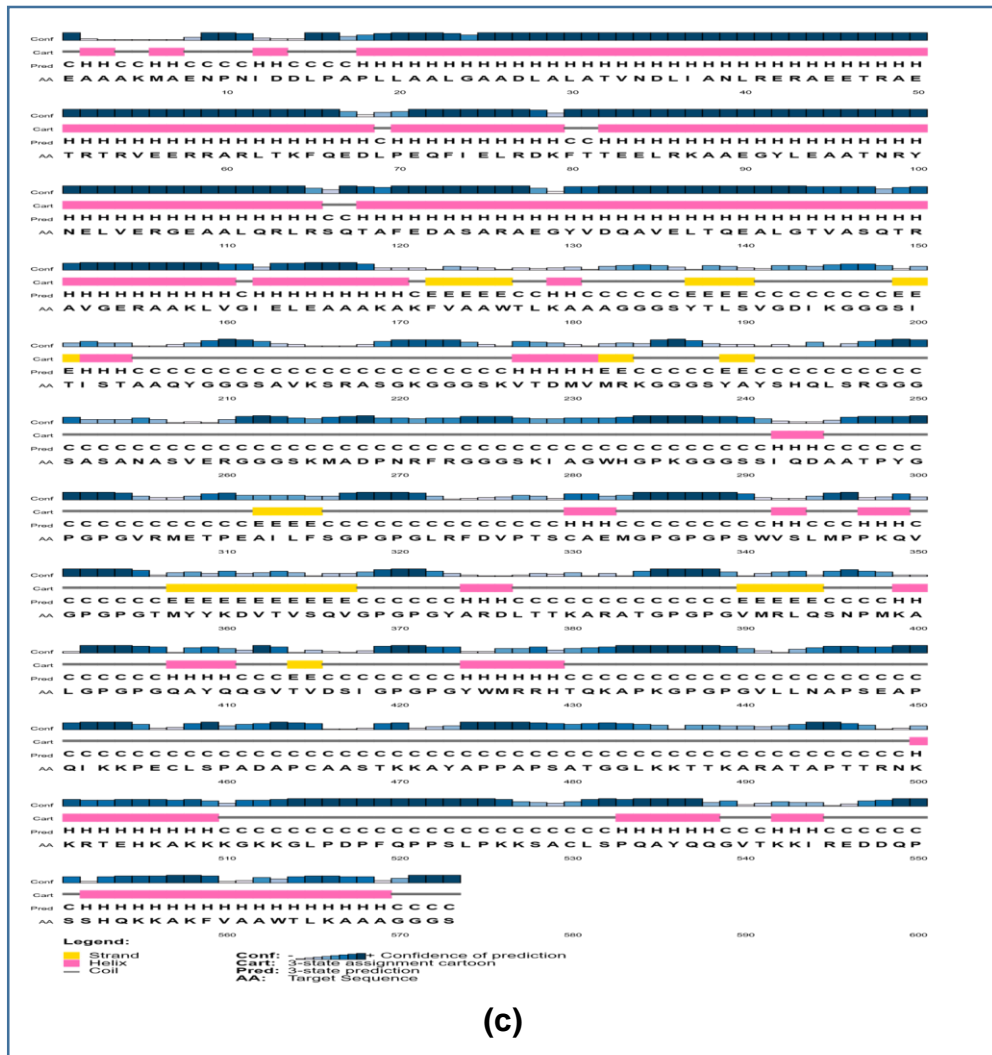

**Supplementary Figure S5.** The results of the secondary structure prediction of the constructed HSV vaccines. Here, (a) is HV-1, (b) is HV-2, (c) is HV-3.

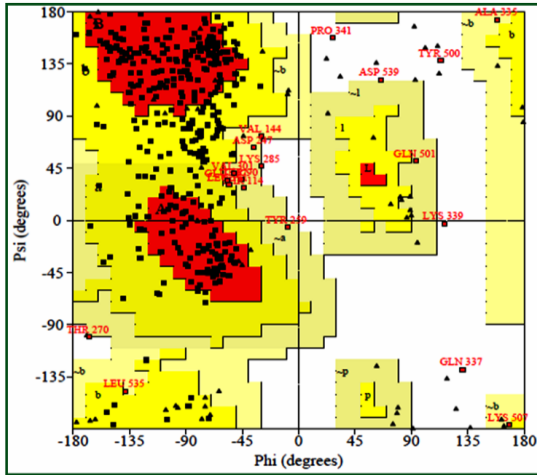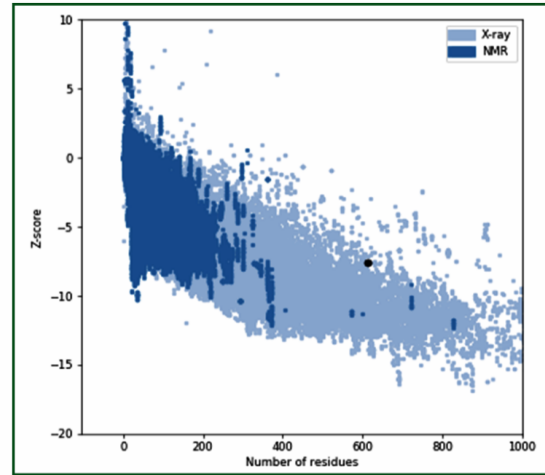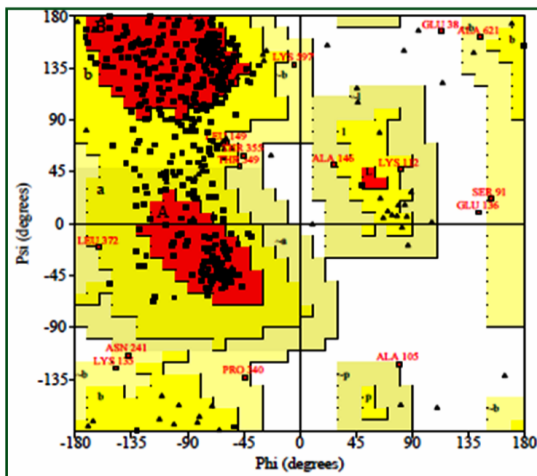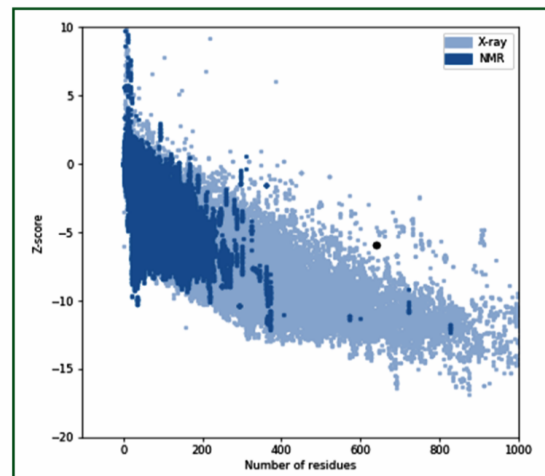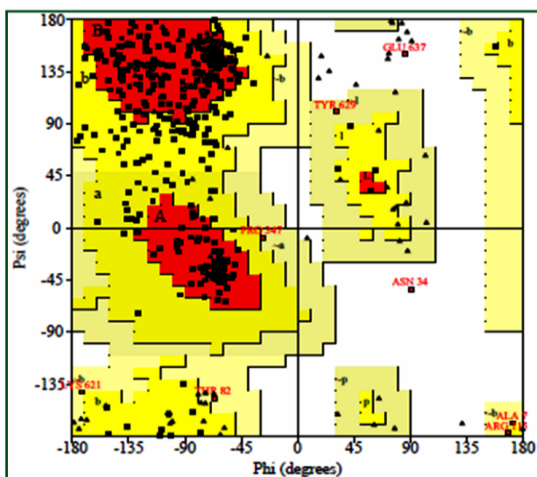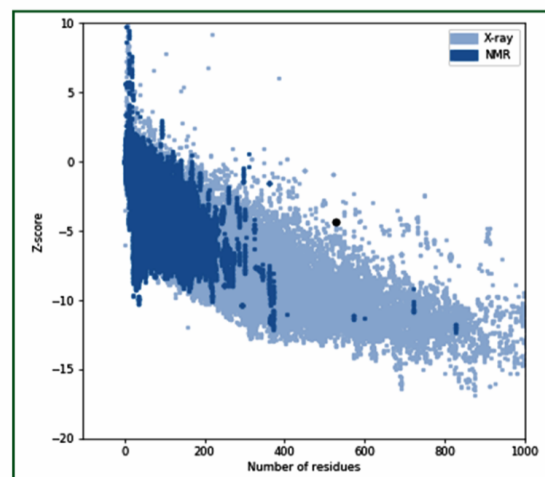

Ramachandran plots

Z-score graphs

**Supplementary Figure S6.** The results of the Ramachandran plot analysis generated by PROCHECK server (left) and quality score or z-score graphs (right) generated by the ProSA-web server of the three refined vaccine constructs, (a) HV-1, (b) HV-2, (c) HV-3. In the Ramachandran plots, the orange and deep yellow colored regions are the allowed regions, the light yellow regions are the generously allowed regions and the white regions are the outlier regions and the glycine residues are represented as triangles. All the three vaccine constructs were predicted to have quite good structural quality.

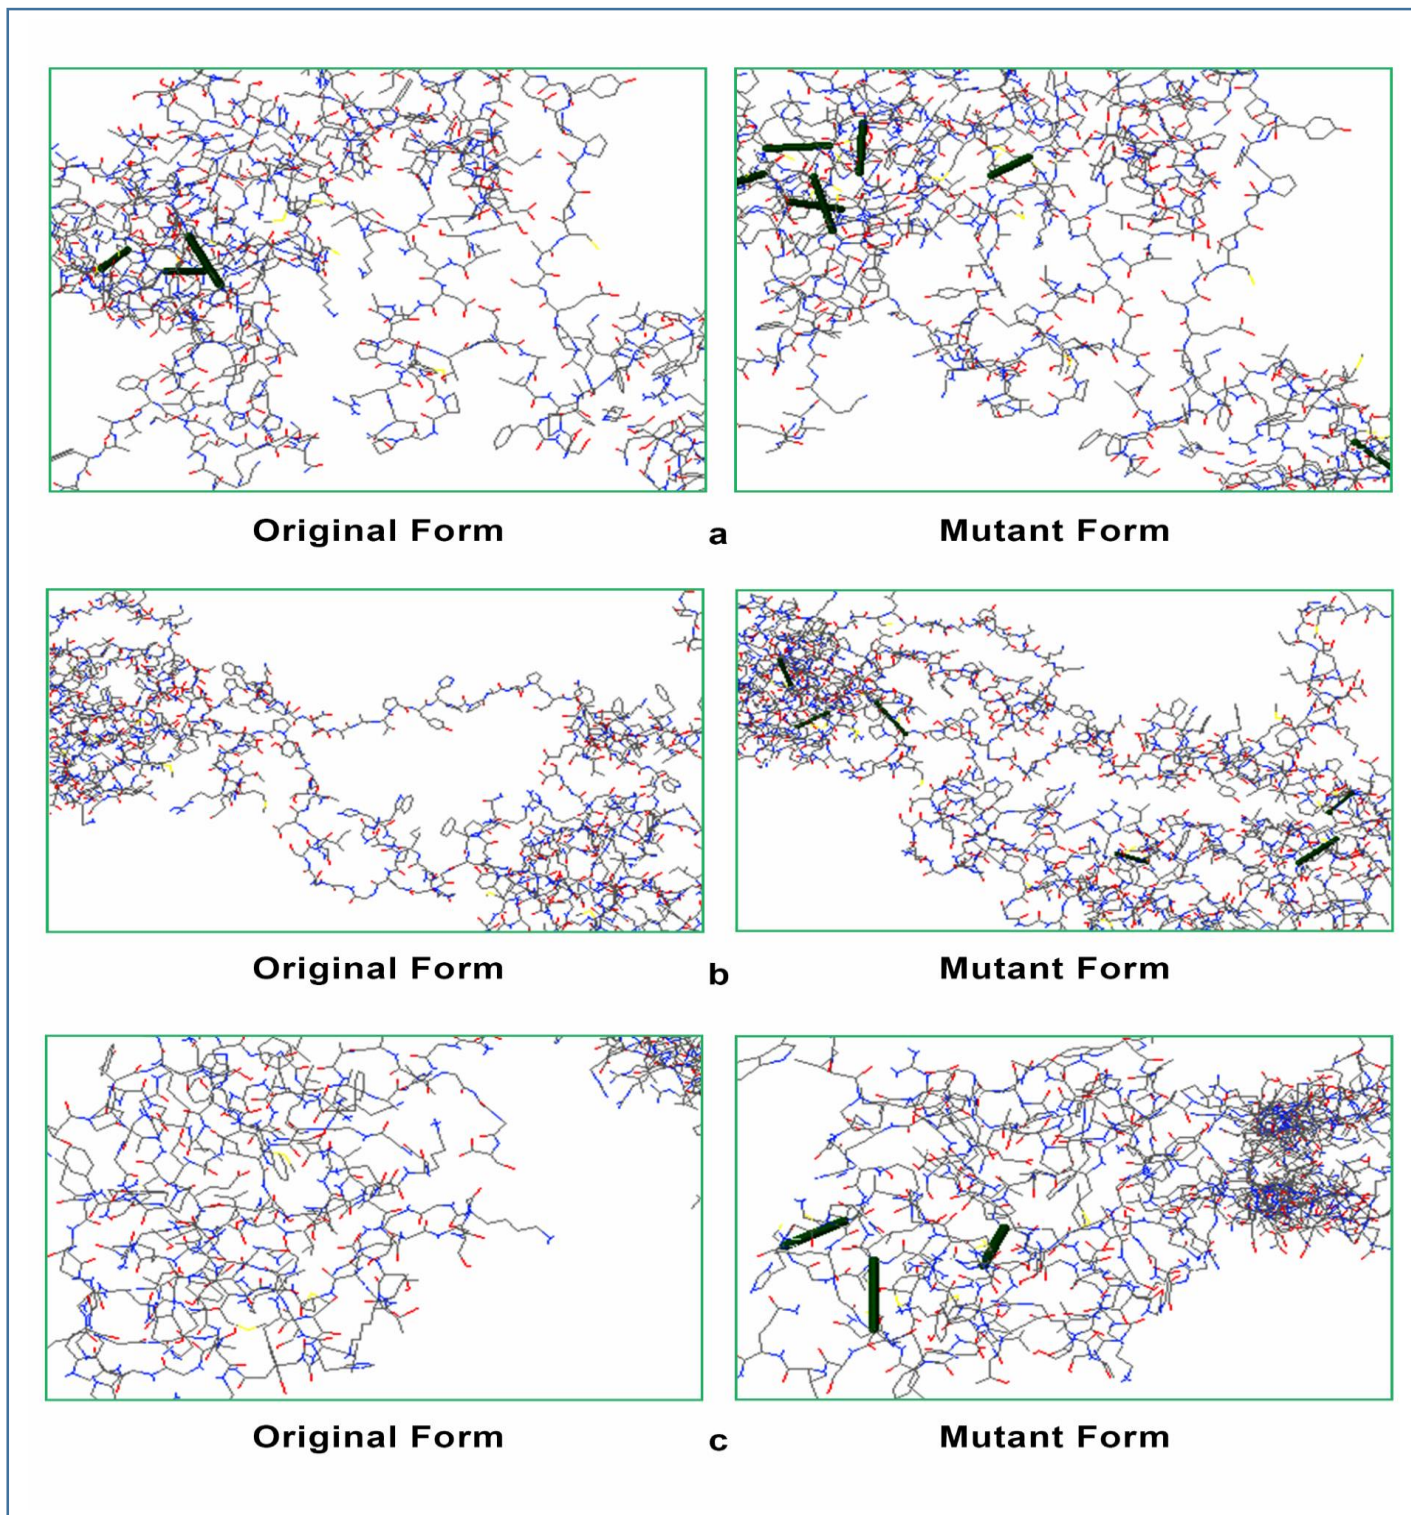

**Supplementary Figure S7.** The disulfide engineering of the three vaccine constructs, both the original (left) and mutant (right) forms are shown. Here, (a) HV-1, (b) HV-2, (c) HV-3.

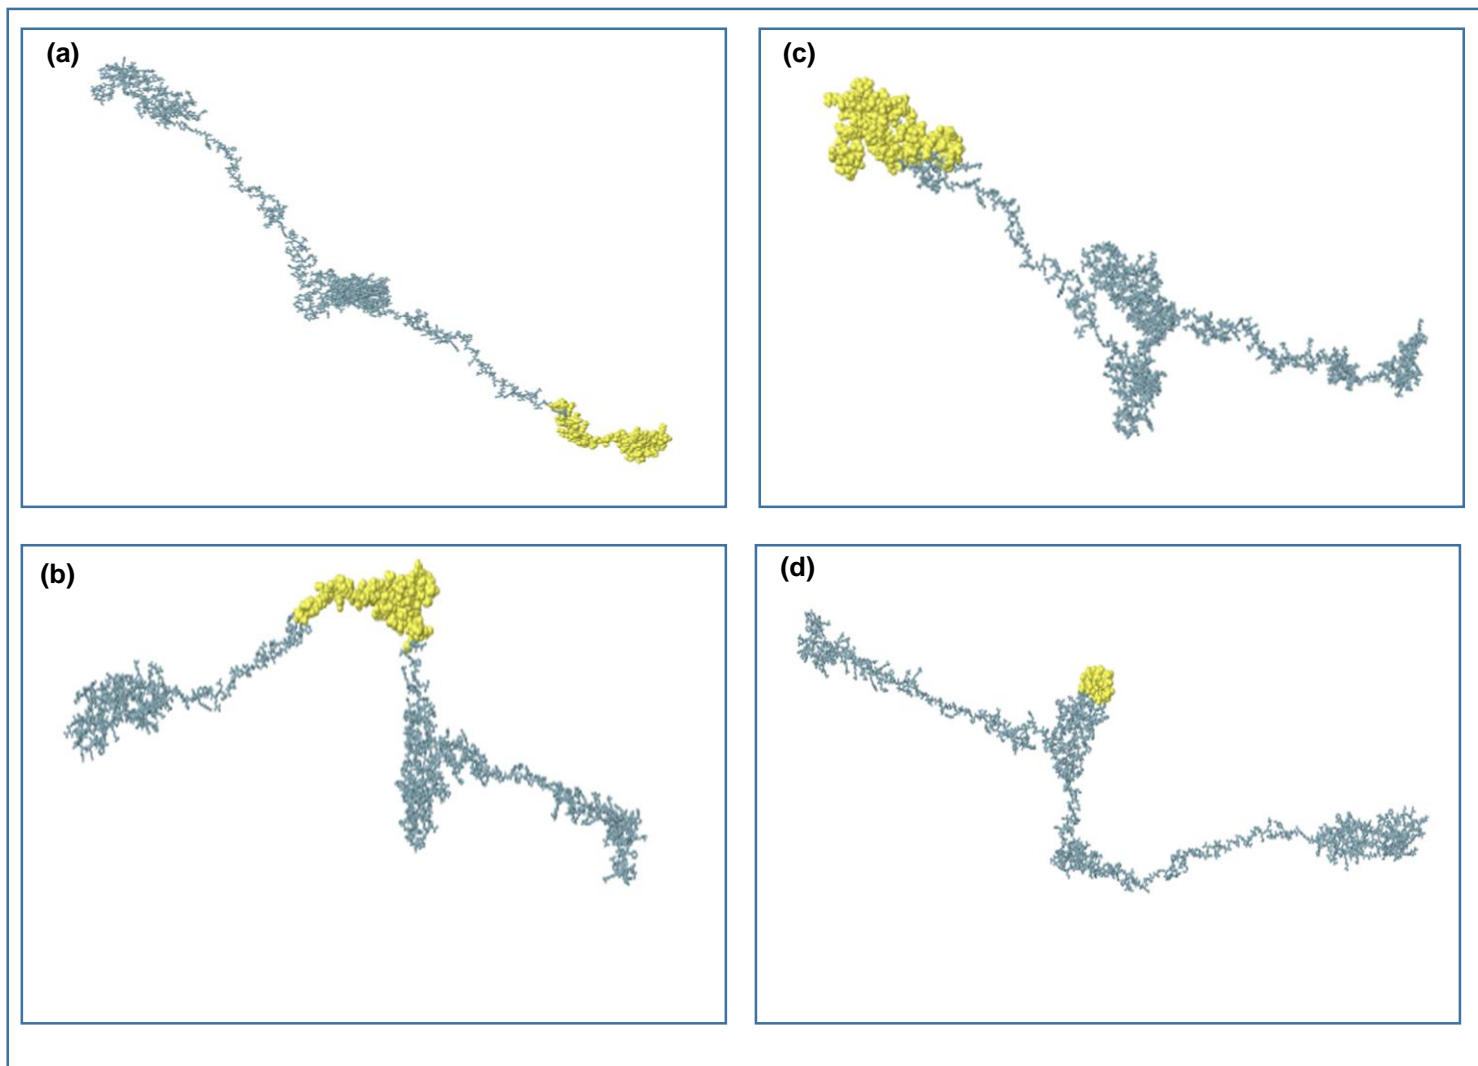

**Supplementary Figure S8.** Graphical representations of the five predicted conformational B-cell epitopes of HV-1 vaccine construct. The B-cell epitopes are indicated by yellow colored ball-shaped structures.

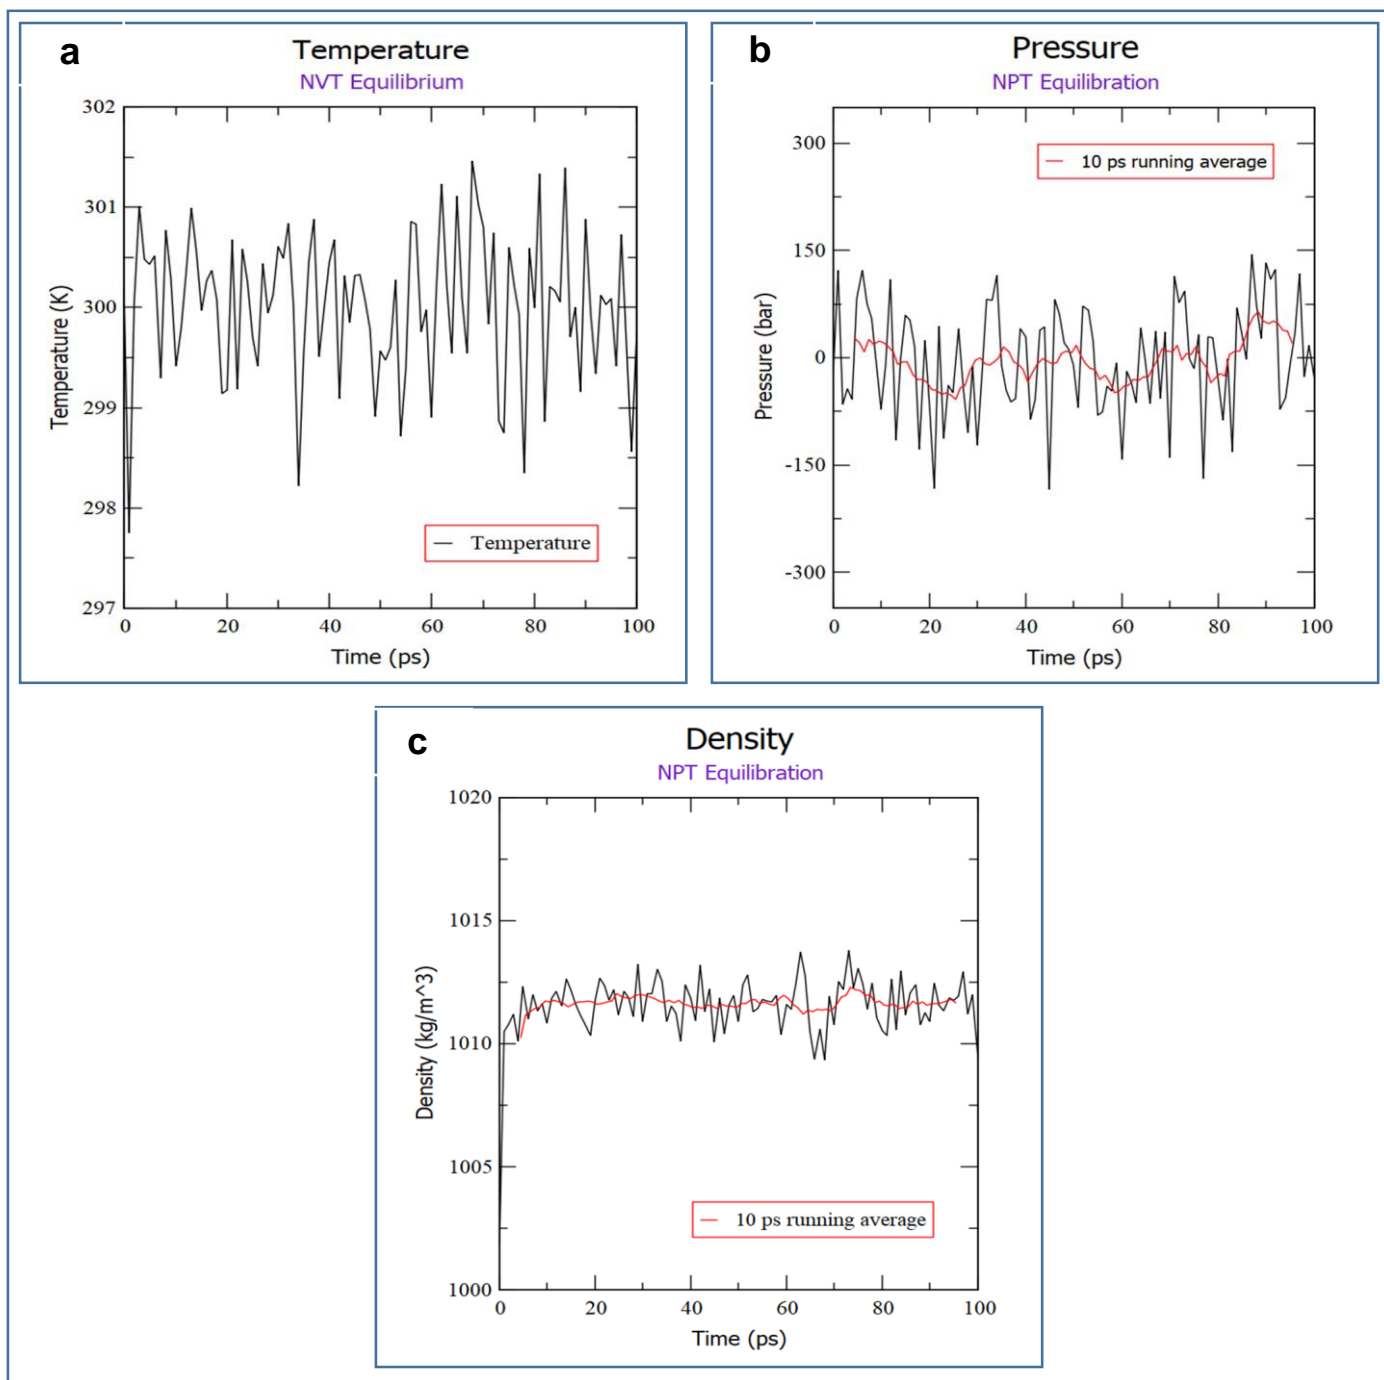

**Supplementary Figure S9.** (a) Temperature variations during simulation. Temperature had reached 300K and showed minimum fluctuations afterwards. (b) Pressure variations along with a running average with 10 ps window. (c) Density variations over 100 ps with a running average plot with 10 ps window.



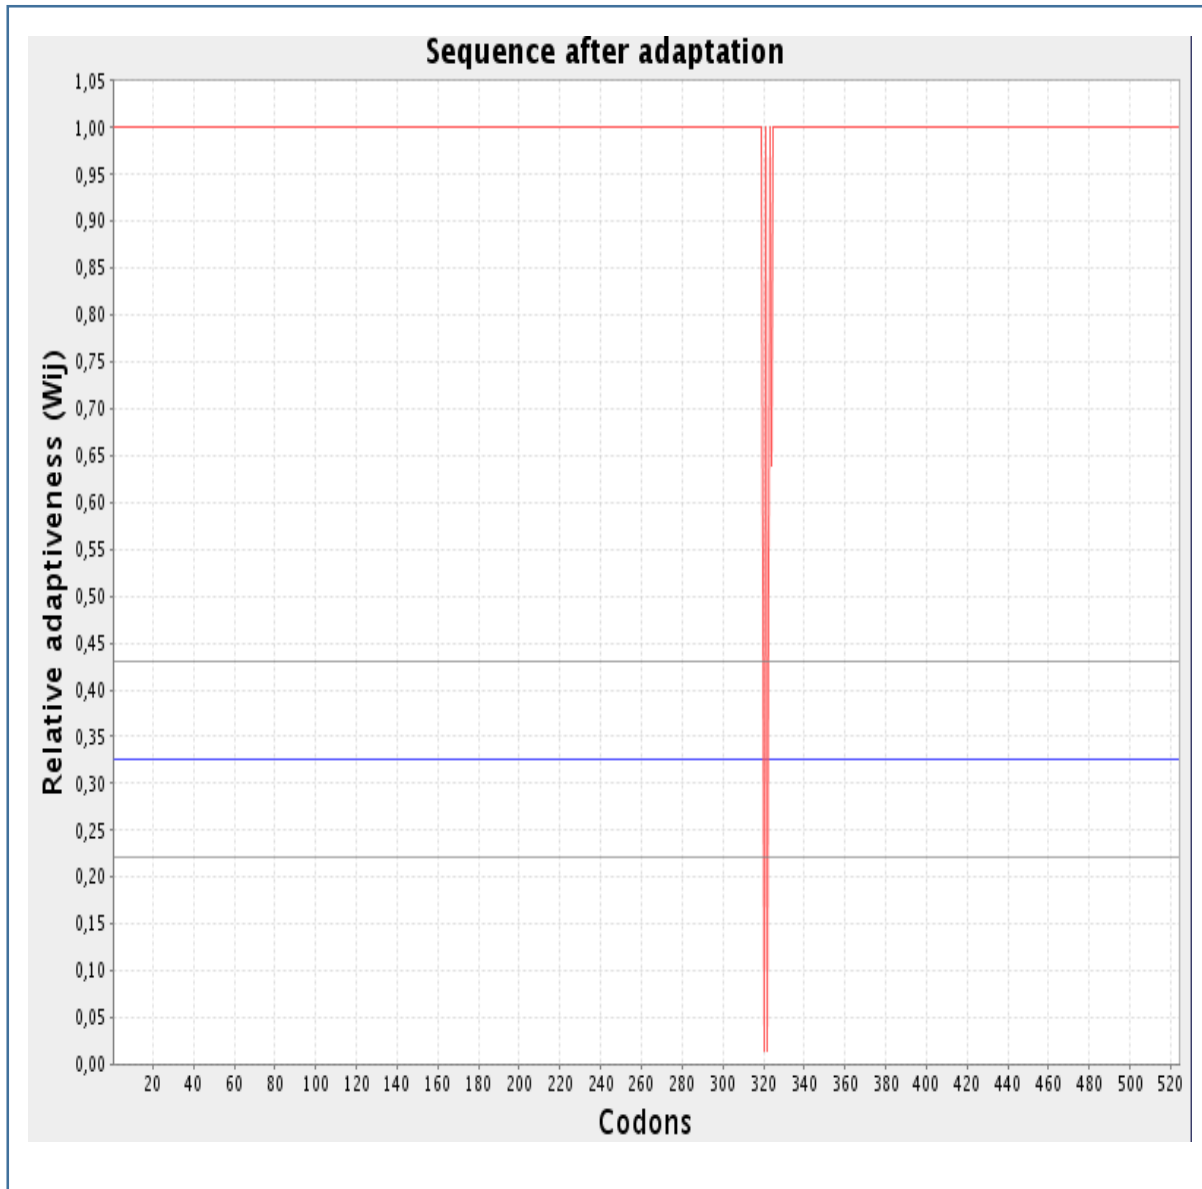

**Supplementary Figure S10.** Figure showing the codon adaptation graph of the HV-1 vaccine.
